# Supplementary material
Source: Springer Nature journal article supplement (https://www.springermedizin.de/resource/supplementary/12889_2013_6610_MOESM6_ESM.pdf/9498728)

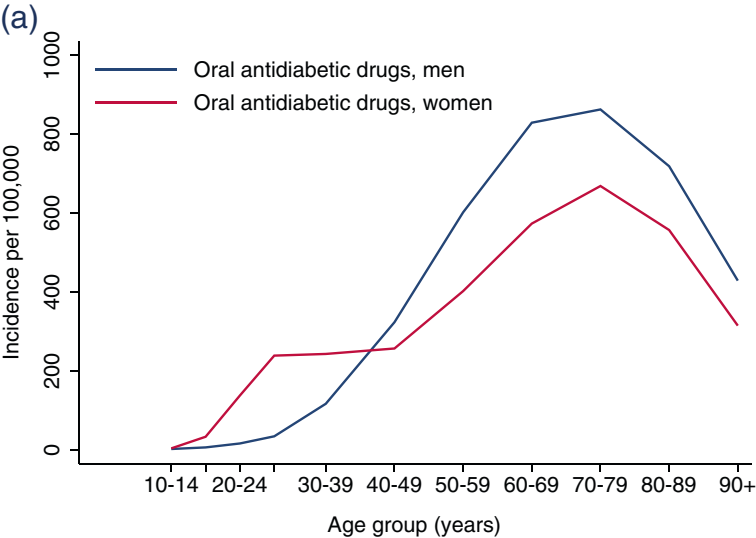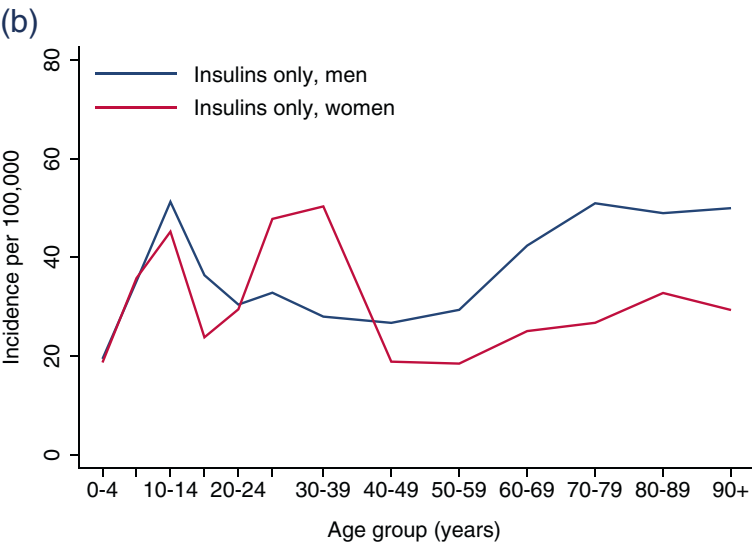

Supplement: MOESM6 [file 9498728]
